# Supplementary material for: Hydrogen sulfide modulates cadmium-induced physiological and biochemical responses to alleviate cadmium toxicity in rice
Source: PubMed Central journal article supplement (PMC4566128; doi:10.1038/srep14078), 2015-09-11
Supplement: srep14078-s1.pdf [file srep14078-s1.pdf]

**Title: Hydrogen sulfide modulates cadmium-induced physiological and  
biochemical responses to alleviate cadmium toxicity in rice**

Authors: Mohammad Golam Mostofa<sup>1,2</sup>, Anisur Rahman<sup>1</sup>, Md. Mesbah Uddin Ansary<sup>3</sup>,

Ayaka Watanabe<sup>1</sup>, Masayuki Fujita<sup>1,\*</sup>, and Lam-Son Phan Tran<sup>4,\*</sup>

**Supplementary Figure S1.** Experimental set up. Healthy rice seeds were washed with distilled water and imbibed for 2 days in the dark. The imbibed seeds were sown on plastic nets floating on distilled water in 250 mL plastic beakers and kept in the dark for germination at  $28 \pm 2^\circ\text{C}$  for 3 days. Uniformly germinated seeds were transferred to a growth chamber and grown in a commercial hydroponics solution. At 13 days, rice plants were subjected to a combination of different doses of NaHS, hypotaurine and  $\text{CdCl}_2$ . After 3 days of treatments, that is, at day 16<sup>th</sup>, plants were harvested for collecting data on various physiological and biochemical parameters.

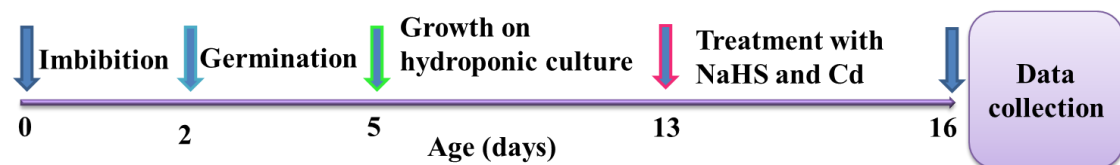

**Supplementary Table S1.** Experimental design.

| No.                         | Treatments                                                                 |
|-----------------------------|----------------------------------------------------------------------------|
| 1) Control                  | Only nutrient solution                                                     |
| 2) H <sub>2</sub> S         | 100 $\mu$ M NaHS                                                           |
| 3) H <sub>2</sub> S+HT      | 100 $\mu$ M NaHS + 200 $\mu$ M hypotaurine                                 |
| 4) Cd1                      | 250 $\mu$ M CdCl <sub>2</sub>                                              |
| 5) H <sub>2</sub> S+Cd1     | 100 $\mu$ M NaHS + 250 $\mu$ M CdCl <sub>2</sub>                           |
| 6) Cd2                      | 500 $\mu$ M CdCl <sub>2</sub>                                              |
| 7) H <sub>2</sub> S+Cd2     | 100 $\mu$ M NaHS + 500 $\mu$ M CdCl <sub>2</sub>                           |
| 8) H <sub>2</sub> S+ HT+Cd2 | 100 $\mu$ M NaHS + 200 $\mu$ M hypotaurine + 500 $\mu$ M CdCl <sub>2</sub> |
| 9) Cd3                      | 1000 $\mu$ M CdCl <sub>2</sub>                                             |
| 10) H <sub>2</sub> S+Cd3    | 100 $\mu$ M NaHS + 1000 $\mu$ M CdCl <sub>2</sub>                          |

All the treatments were imposed by applying them in the nutrient solution. Control, H<sub>2</sub>S, H<sub>2</sub>S+HT, Cd1, H<sub>2</sub>S+Cd1, Cd2, H<sub>2</sub>S+Cd2, H<sub>2</sub>S+HT+Cd2, Cd3 and H<sub>2</sub>S+Cd3 correspond to the group of seedlings exposed to only nutrients, 100  $\mu$ M NaHS, 100  $\mu$ M NaHS + 200  $\mu$ M hypotaurine, 250  $\mu$ M CdCl<sub>2</sub>, 100  $\mu$ M NaHS + 250  $\mu$ M CdCl<sub>2</sub>, 500  $\mu$ M CdCl<sub>2</sub>, 100  $\mu$ M NaHS + 500  $\mu$ M CdCl<sub>2</sub>, 100  $\mu$ M NaHS + 200  $\mu$ M hypotaurine + 500  $\mu$ M CdCl<sub>2</sub>, 1000  $\mu$ M CdCl<sub>2</sub> and 100  $\mu$ M NaHS + 1000  $\mu$ M CdCl<sub>2</sub>, respectively.
